# Supplementary material
Source: Springer Nature journal article supplement (https://www.springermedizin.de/resource/supplementary/12876_2009_457_MOESM3_ESM.pdf/9437052)
Supplement: MOESM3 [file 9437052]

The image shows a white, pill-shaped capsule with a central white band. The band features the 'Pillcam' logo in blue, with 'COLON' written in white on a blue oval background below it. The capsule is shown from a perspective that highlights its rounded ends and the central band.

**Pillcam**<sup>®</sup>

**COLON**
